# Supplementary material
Source: publisher figshare collection journal article supplement (https://acs.figshare.com/ndownloader/files/4304311)
Supplement: Supplementary file 1 [file 4304311]

# Supporting Information

## A New and Facile Method to Prepare Uniform Hollow MnO/Functionalized-mSiO<sub>2</sub> Core/Shell Nanocomposites

*Yung-Kang Peng,<sup>1</sup> Chih-Wei Lai,<sup>1</sup> Chien-Liang Liu,<sup>1</sup> Hsieh-Chih Chen,<sup>1</sup> Yi-Hsuan Hsiao,<sup>1</sup> Wei-Liang Liu,<sup>2</sup> Kuo-Chun Tang,<sup>1</sup> Yun Chi,<sup>2</sup> Jong-Kai Hsiao,<sup>3,4\*</sup> Kun-Eng Lim,<sup>3,4</sup> Hung-En Liao,<sup>3</sup> Jing-Jong Shyue<sup>5</sup> and Pi-Tai Chou<sup>1\*</sup>*

<sup>1</sup>Department of Chemistry, National Taiwan University, Taipei 106, Taiwan

<sup>2</sup>Department of Chemistry, National Tsing Hua University, Hsinchu 300, Taiwan

<sup>3</sup>Department of Medical Imaging, Buddhist Tzu Chi General Hospital, Taipei branch, Taiwan

<sup>4</sup>School of Medicine, Tzu Chi University, Hualien, Taiwan

<sup>5</sup>Research Center for Applied Science, Academia Sinica, Taipei 115, Taiwan

\*Email: [chop@ntu.edu.tw](mailto:chop@ntu.edu.tw) (P.T.C.), [jongkai@tzuchi.com.tw](mailto:jongkai@tzuchi.com.tw) (J.K.H.)

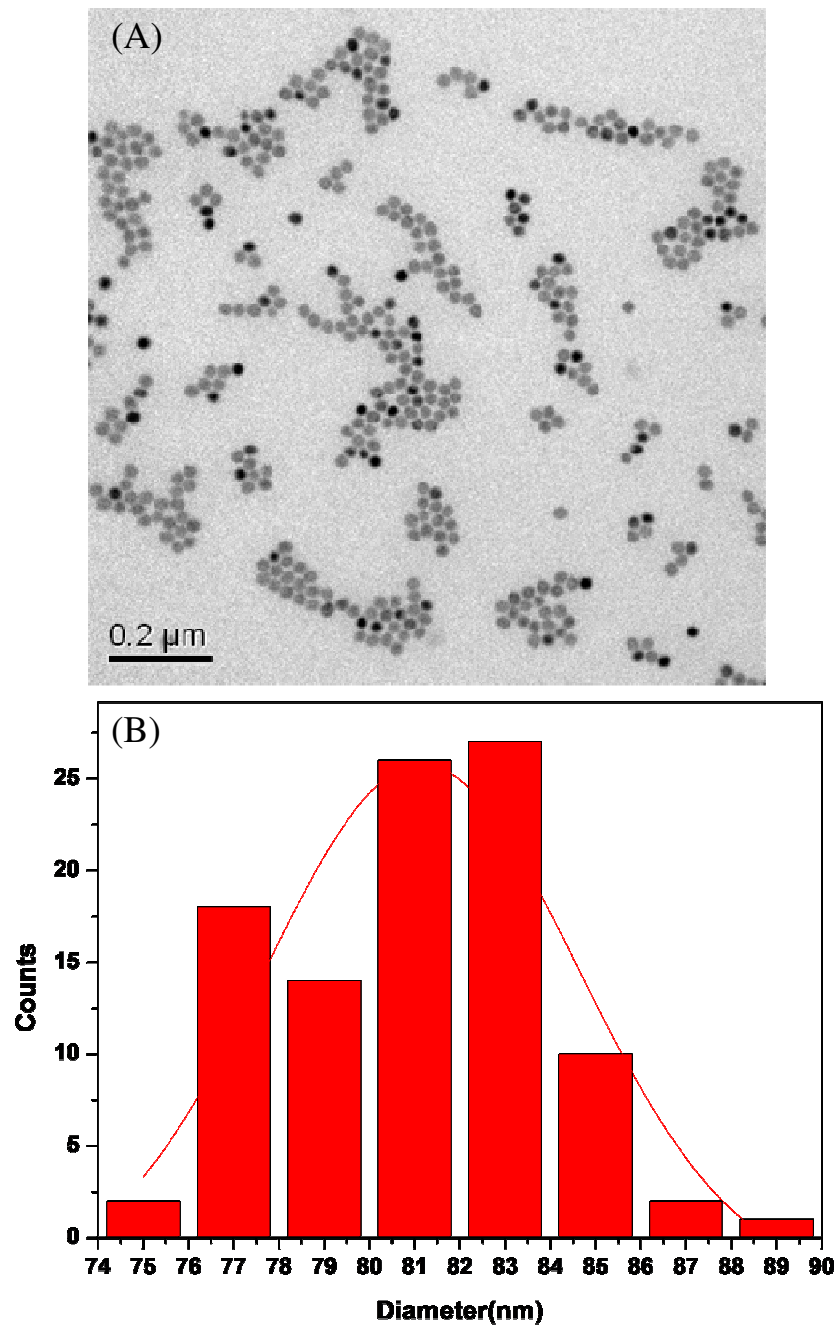

**Figutr S1.** (A) TEM image of MnO nanocrystals dispersed in aqueous phase using CTAB as secondary surfactant. (B) The histogram analysis of H-MnO@mSiO<sub>2</sub>(Ir)@PEG shown in Figure 1C and 1D. (100 particles are used in this histogram) The average diameter of the NPs is  $81 \pm 2.8 \text{ nm}$  ( $\sigma$ : 3.48%).

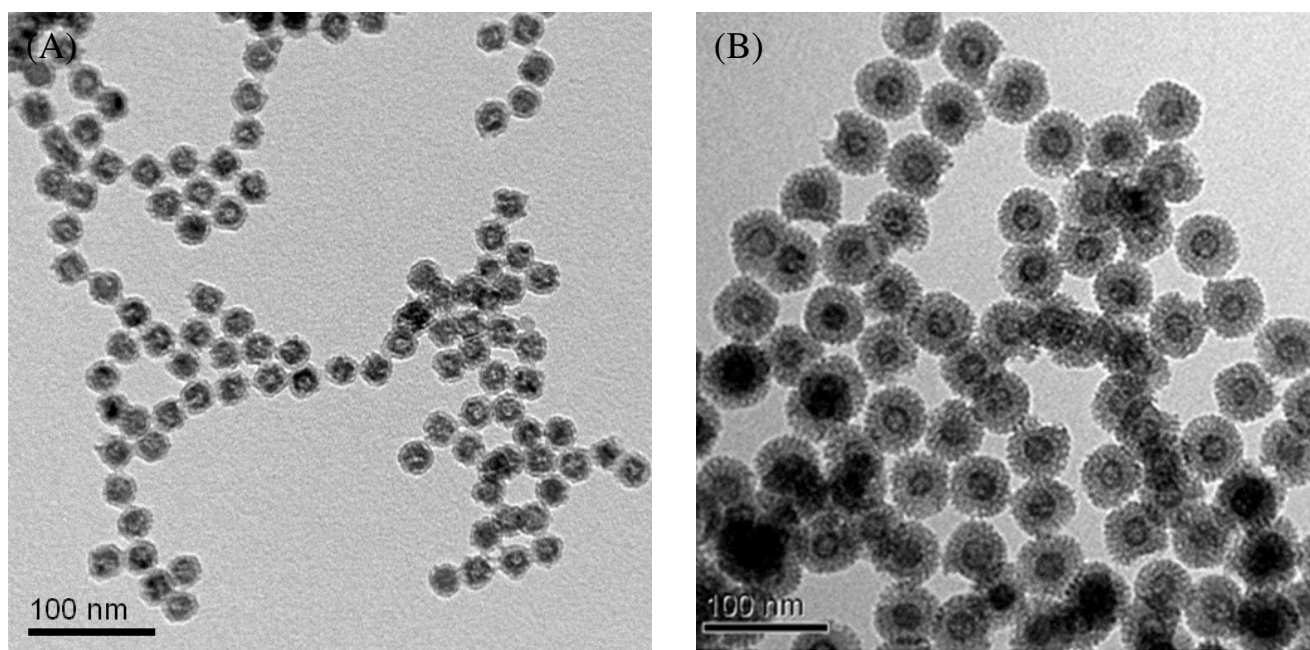

**Figure S2.** TEM image of different sized uniform H-MnO@mSiO<sub>2</sub>(Ir)@PEG with (A) 4 nm (B) 13 nm shell.

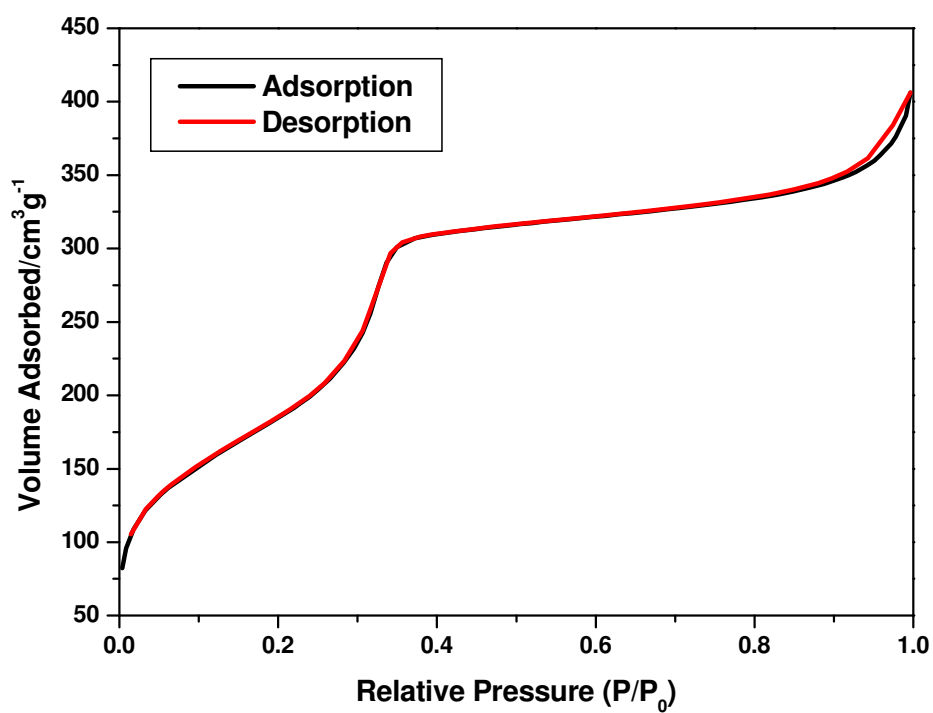

**Figure S3.** N<sub>2</sub> adsorption-desorption isotherm of H-MnO@mSiO<sub>2</sub>(Ir)@PEG.

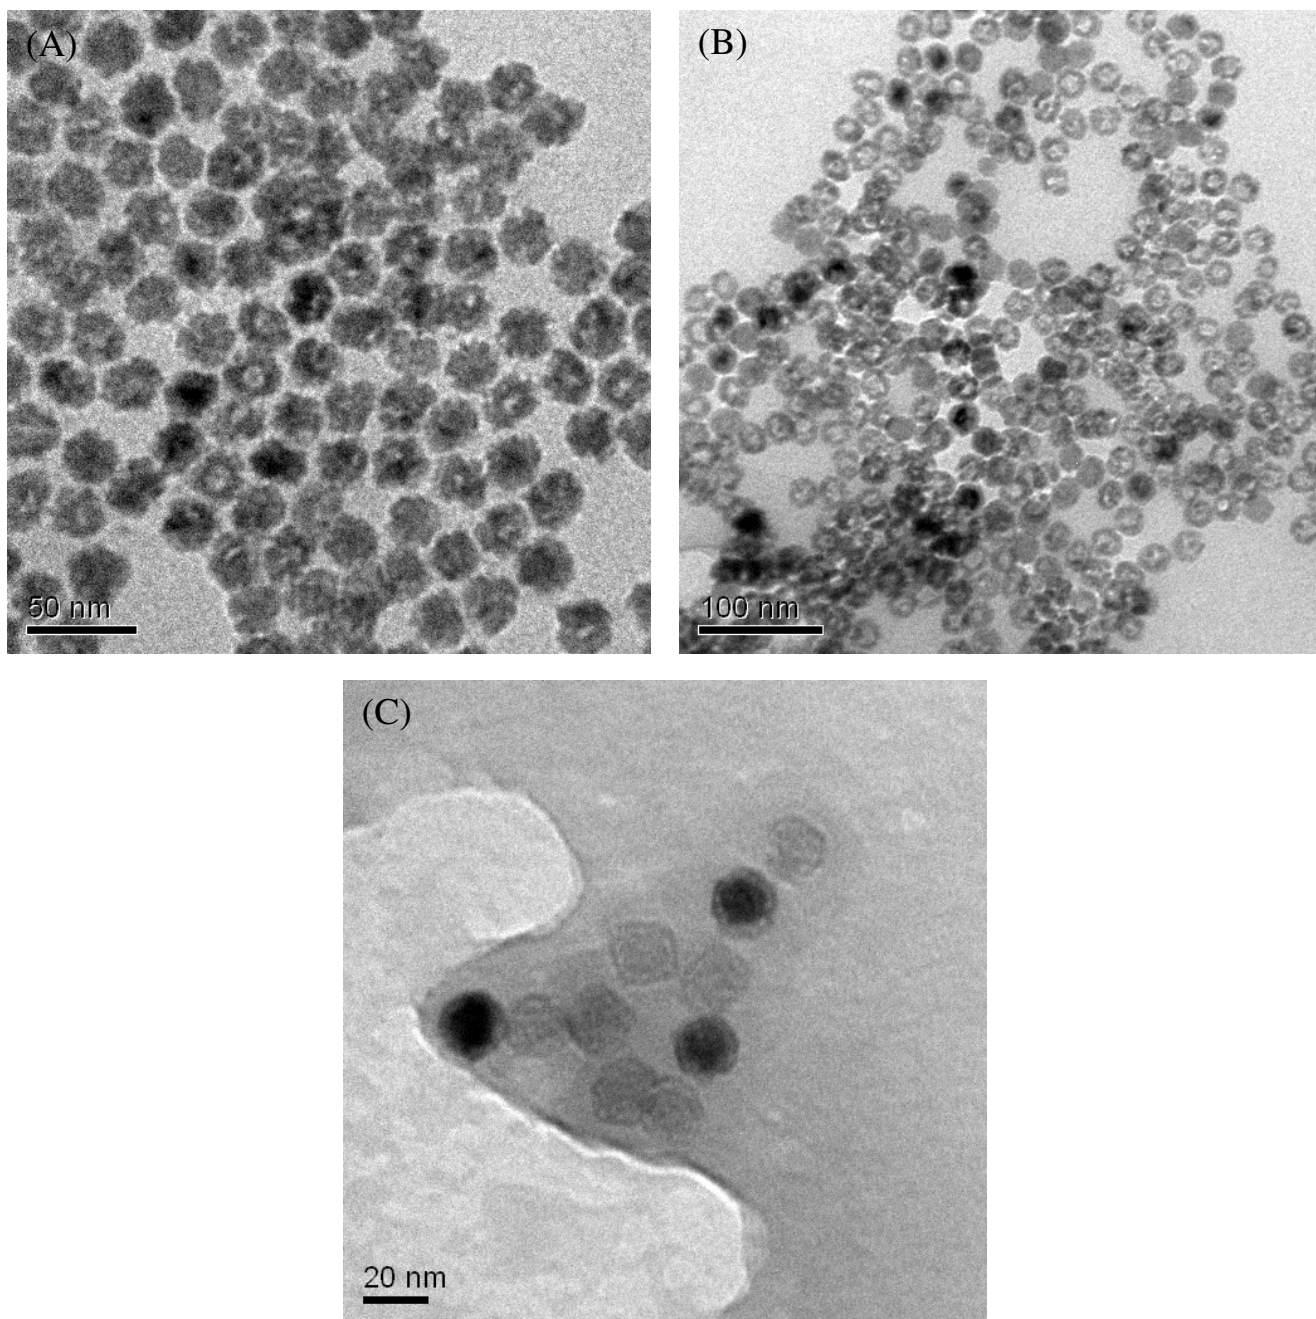

**Figure S4.** TEM image of MnO nanocrystals treated with (A) ethylacetate. (B, C) sodium acetate for 24 and 10 hr, respectively.

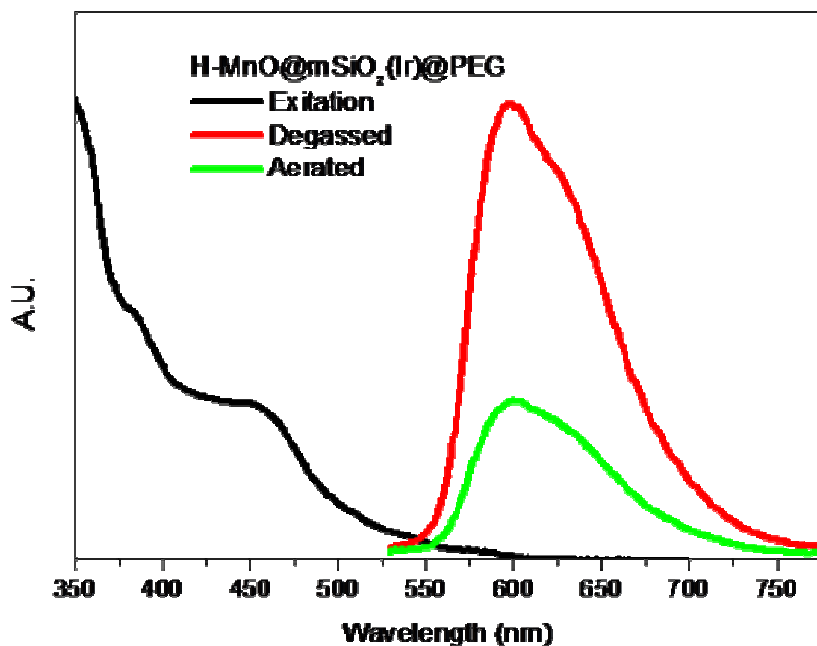

**Figure S5.** Excitation and emission spectra of H-MnO@mSiO<sub>2</sub>(Ir)@PEG nanoparticles. The excitation spectrum (black) in degassed solution was monitored at the emission wavelength of 600 nm. Emission spectrum was measured in aerated (green) and degassed (red) aqueous solution.

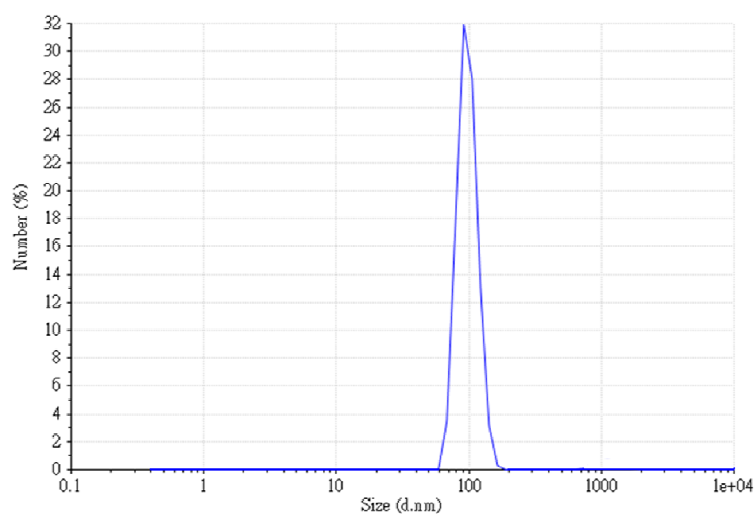

**Figure S6.** Dynamic light scattering (DLS) in PBS solution shows the average hydrodynamic size of the NPs is 98.4 nm.

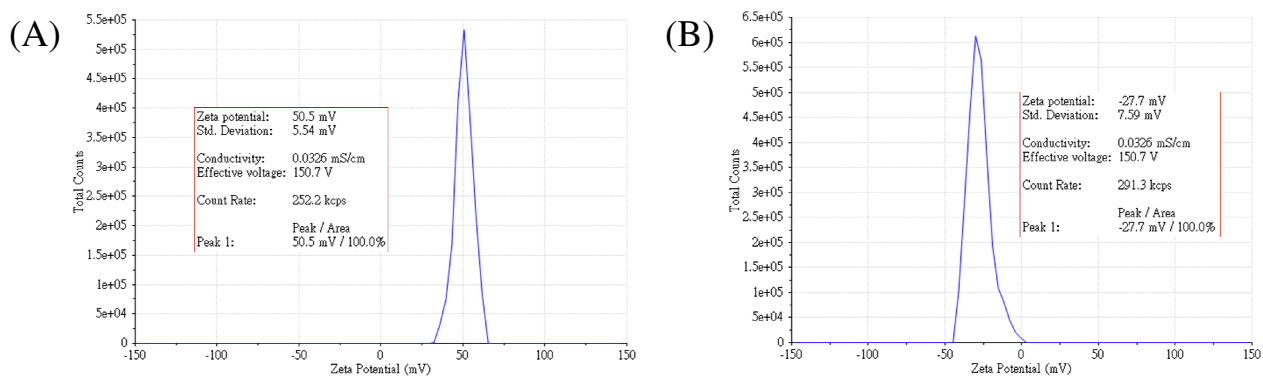

**Figure S7.** Zetapotential distribution shows the surface charge of (A) before (B) after CTAB extraction is 50.5 mV and -27.7 mV, respectively

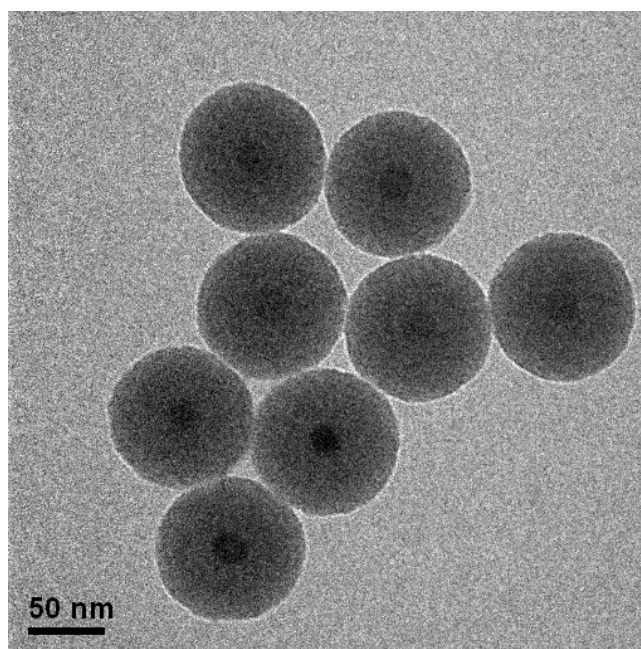

**Figure S8.** TEM image of MnO@SiO<sub>2</sub> nanoparticles.

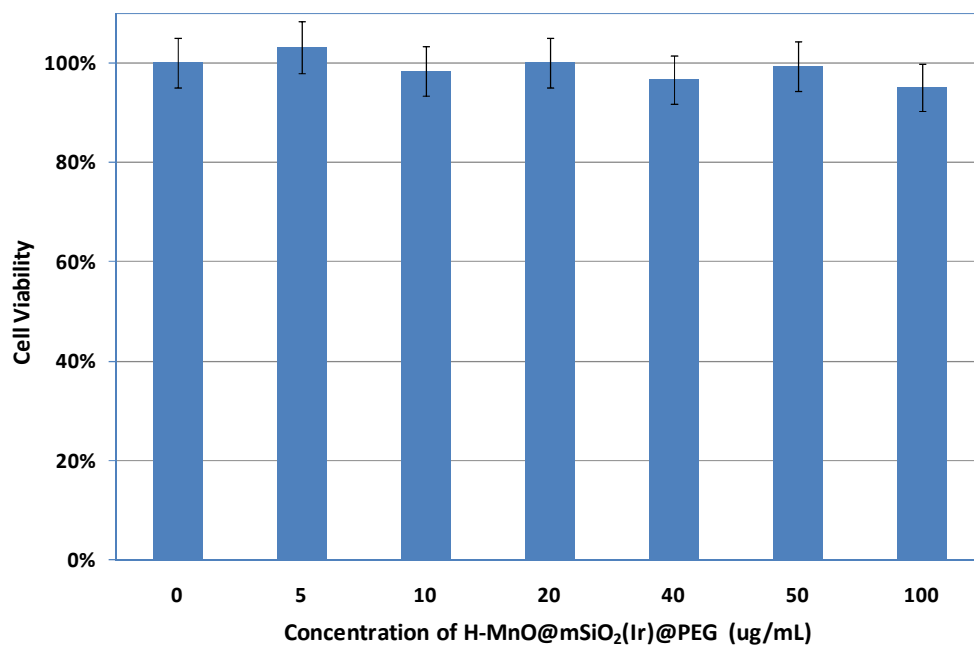

**Figure S9.** MTT Assay of HeLa cells treated with H-MnO@mSiO<sub>2</sub>(Ir)@PEG ranged from 0 to 100 µg/mL.



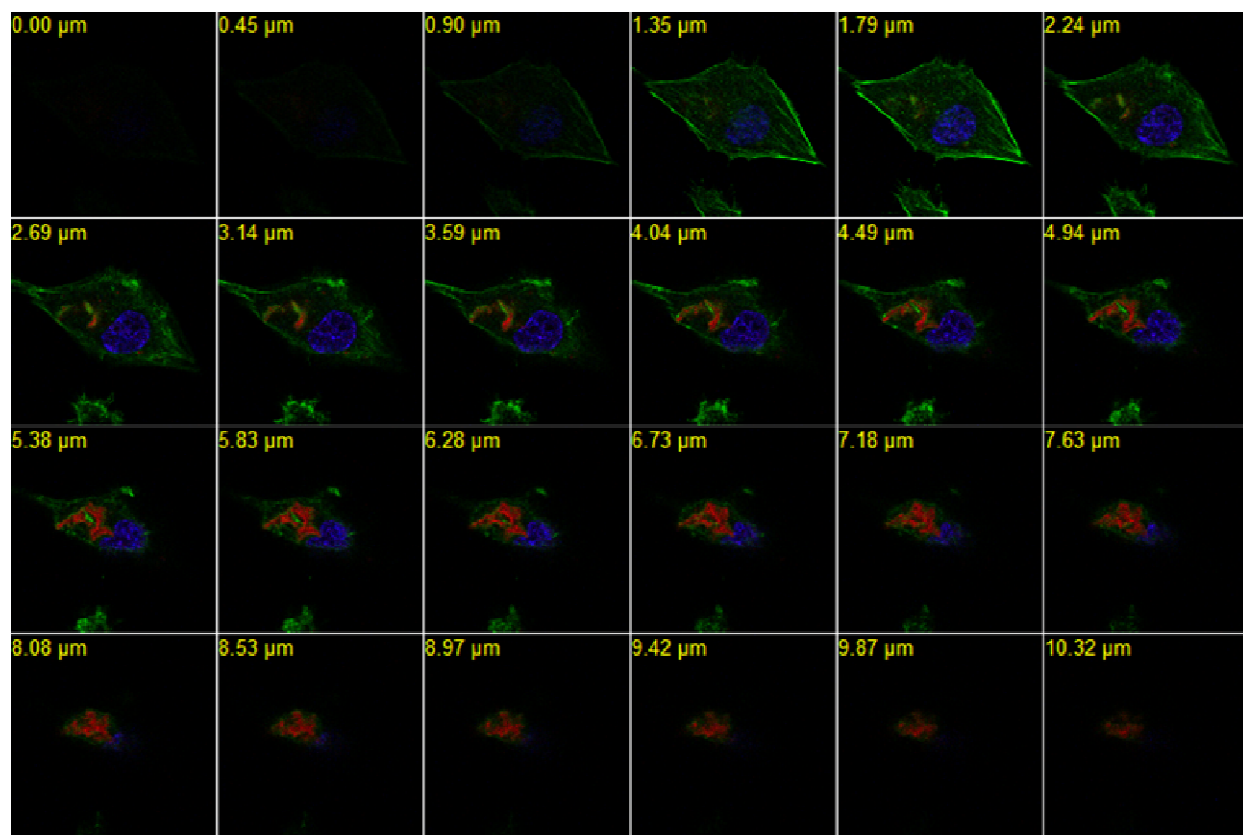

**Figure S10.** Confocal microscopy exam of H-MnO@mSiO<sub>2</sub>(Ir)@PEG. For confirmation of the exact intracellular location of H-MnO@mSiO<sub>2</sub>(Ir)@PEG, HeLa treated with H-MnO@mSiO<sub>2</sub>(Ir)@PEG for 48 hours were stained with DAPI for visualization of the cell nucleus and the actin fibers were stained with Rhodamine Phalloidin. These H-MnO@mSiO<sub>2</sub>(Ir)@PEG were located at cytoplasm near nucleus. No H-MnO@mSiO<sub>2</sub>(Ir)@PEG was detected at the cell membrane or nucleus. The finding indicates efficient labelling and specific location characters of the H-MnO@mSiO<sub>2</sub>(Ir)@PEG.
